# Supplementary material for: A light harvesting perylene derivative–zinc phthalocyanine complex in water: spectroscopic and thermodynamic studies
Source: Royal Society of Chemistry journal article supplement (doi:10.1039/c7pp00055c), 2017-03-22
Supplement: c7pp00055c1.pdf [file c7pp00055c1.pdf]

## Supporting Information`s

### **A Light Harvesting Perylene Derivative - Zinc Phthalocyanine Complex in Water: Spectroscopic, and Thermodynamic Studies**

Ahmed El-Refaey, Shaban Y. Shaban, Maged El-Kemary, Mohamed E. El-Khouly

*Department of Chemistry, Faculty of Science, Kafrelsheikh University, Kafrelsheikh 33516, Egypt*

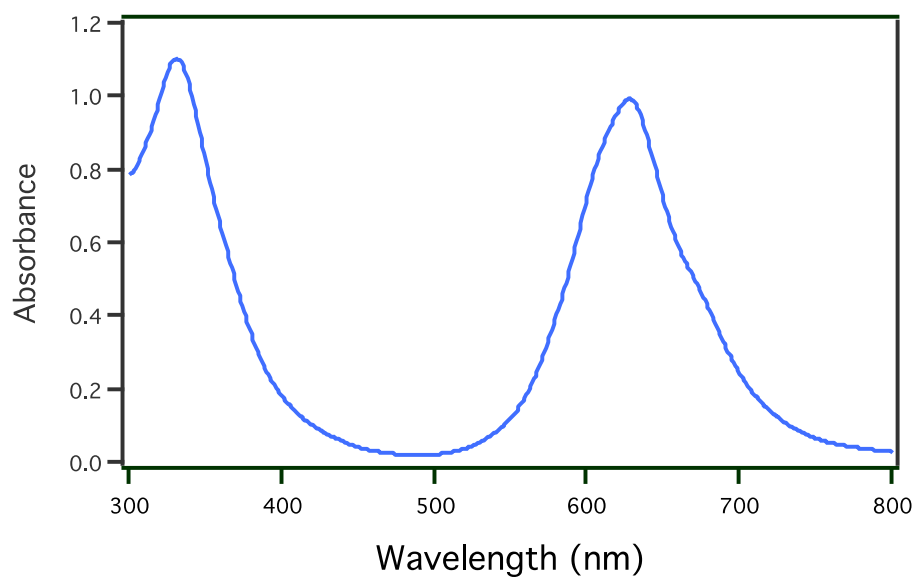

**Figure S1.** Absorption spectrum of ZnPcS<sub>4</sub> in water.

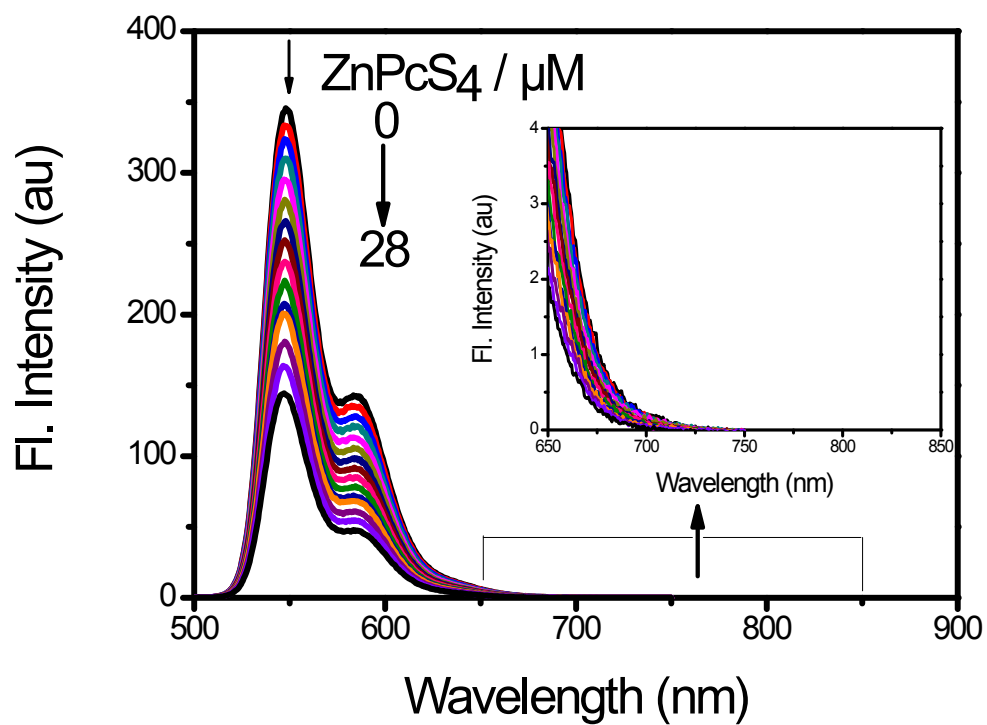

**Figure S2.** Fluorescence quenching of TAIPDII using different concentrations of ZnPcS<sub>4</sub> in water.

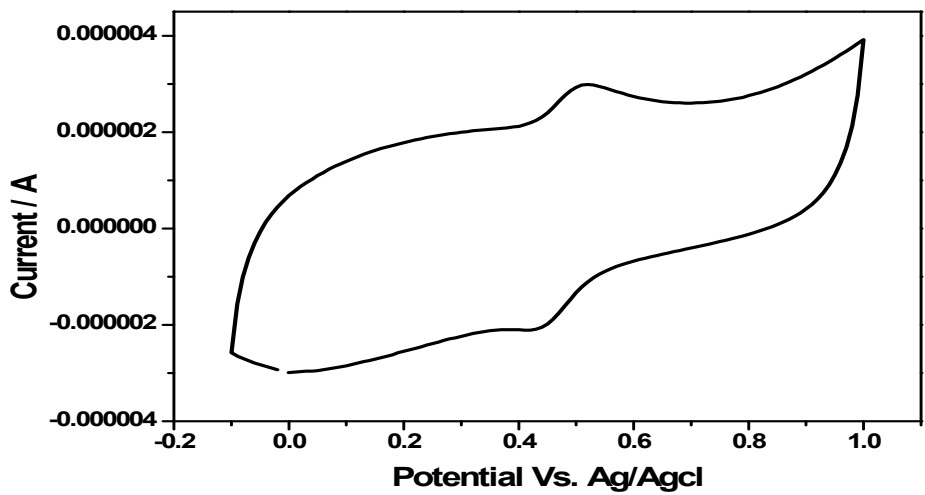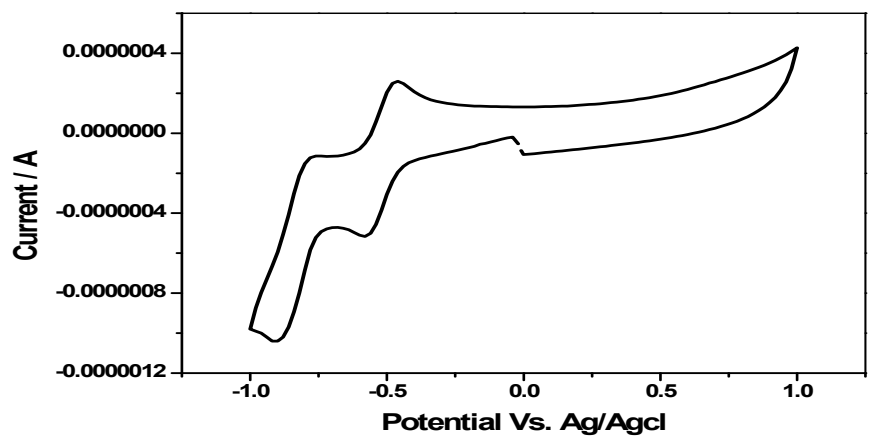

Figure S3. Cyclic voltammograms of ZnPcS<sub>4</sub> (upper figure) and TAIPDI (lower figure) in water.
